# Supplementary material for: The role of ESR1 in regulating lactation traits in buffalo mammary epithelial cells
Source: Copernicus journal article supplement (doi:10.5194/aab-69-347-2026), 2026-06-25
Supplement: Supplementary file [file aab-69-347-2026-supplement.pdf]

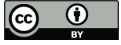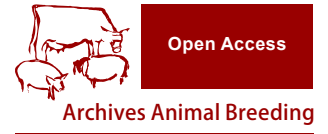

*Supplement of*

## **The role of *ESRI* in regulating lactation traits in buffalo mammary epithelial cells**

**Zhixiang Wang et al.**

*Correspondence to:* Zhipeng Li (zp.li@gxu.edu.cn)

The copyright of individual parts of the supplement might differ from the article licence.

Supplementary file:

Figure S1: Exploration of optimal MOI conditions

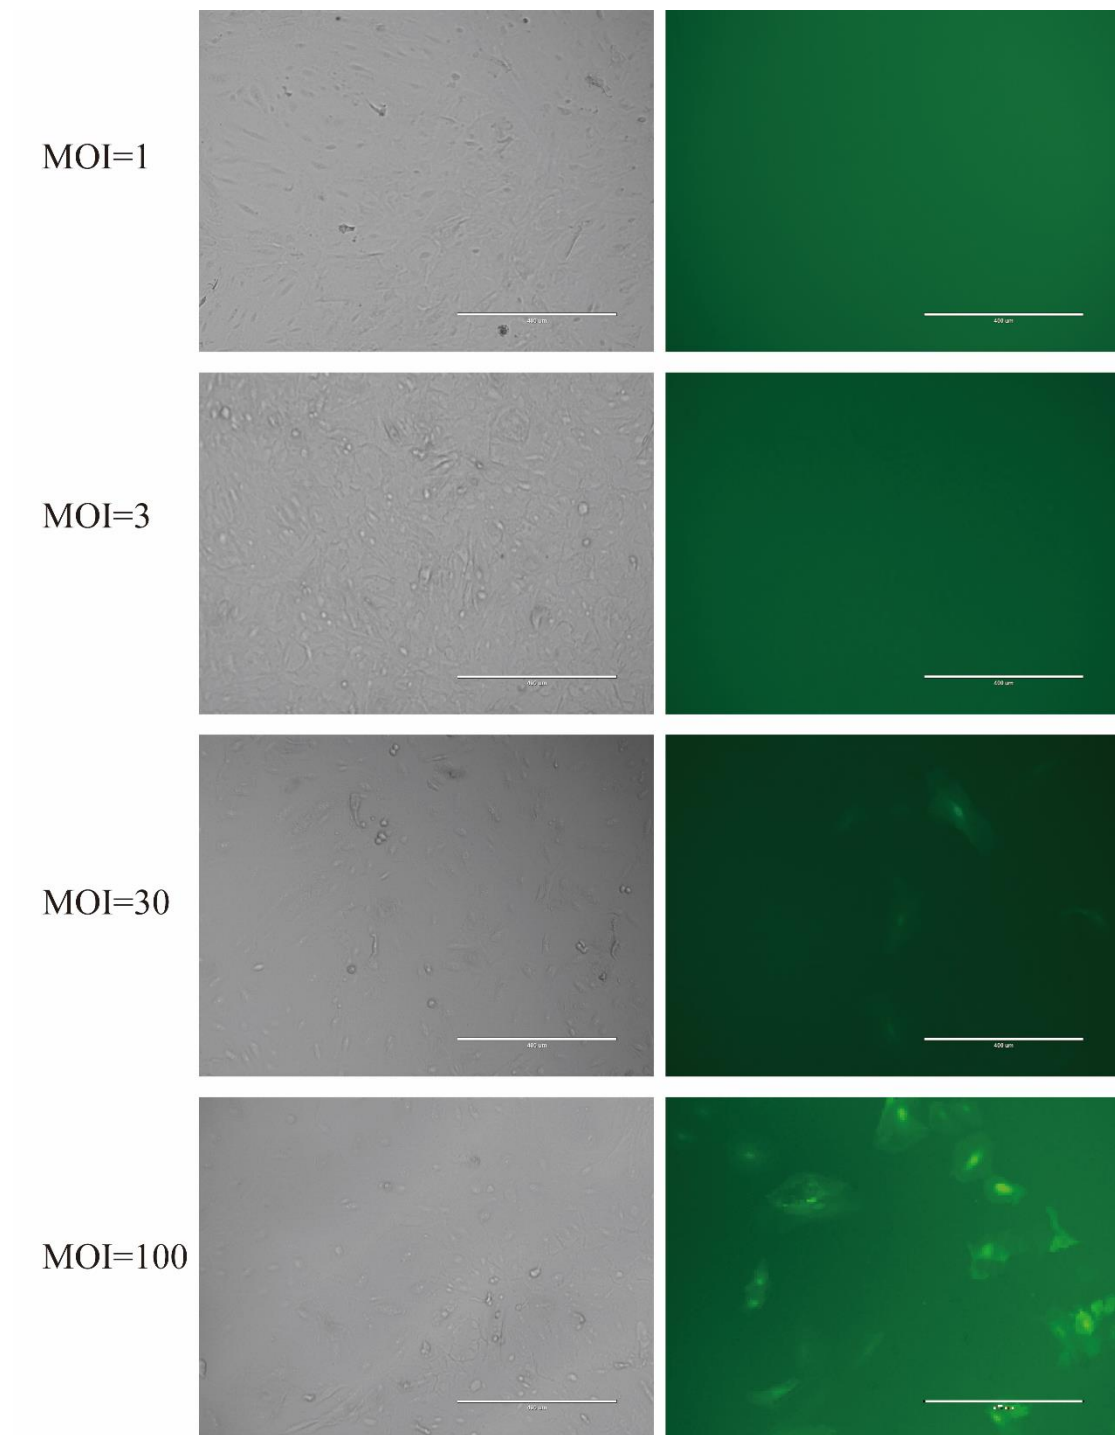

Fluorescent detection of buffalo mammary epithelial cells after lentivirus infection.
